# Supplementary material
Source: PubMed Central journal article supplement (PMC7398049)
Supplement: NIHMS1596061-supplement-Supplemental_table.pdf [file NIHMS1596061-supplement-Supplemental_table.pdf]

## SUPPLEMENTARY TABLES

**Supplementary Table 1.** Indication of E2<sup>Ubc9</sup>'s important atomic positional fluctuation values calculated for the control simulation (in Å).<sup>a</sup>

|                                  | Isolated E2 <sup>Ubc9</sup> | E2 <sup>Ubc9</sup> -E3 <sup>RanBP2</sup> -SUMO-Target <sup>RanGAP1</sup> |           | E2 <sup>Ubc9</sup> -SUMO-Target <sup>RanGAP1</sup> |           |           |
|----------------------------------|-----------------------------|--------------------------------------------------------------------------|-----------|----------------------------------------------------|-----------|-----------|
| <i>For specific time periods</i> |                             |                                                                          |           |                                                    |           |           |
|                                  |                             | Cluster 1                                                                | Cluster 2 | Cluster 1                                          | Cluster 2 | Cluster 3 |
| E2 <sup>Ubc9</sup> 's loop2      | 3.7±1.9                     | 3.5±2.2                                                                  | 2.4±1.1   | 7.5±4.9                                            | 11.4±7.9  | 2.4±1.7   |

<sup>a</sup> Each entry corresponds to mean ± standard deviation of the atomic positional fluctuation values. The maximum and minimum values of the data set are indicated in parentheses.
